# Supplementary material
Source: HighWire-hosted journal article supplement (http://molpharm.aspetjournals.org/highwire/filestream/76786/field_highwire_adjunct_files/5/Supplementary_Table_S3.pdf)
Supplement: Supplementary_Table_S3.pdf [file Supplementary_Table_S3.pdf]

## Identification of Survival Genes in Human Glioblastoma Cells Using siRNA Screening

Nikhil G Thaker, Fang Zhang, Peter R. McDonald, Tong Ying Shun, Michael D Lewen, Ian F. Pollack, and John S. Lazo

Molecular Pharmacology

Supplementary Table S3.

“Survival genes,” present in both the binned (Table S1) and MAD (Table S2) gene lists.

| <b>Gene Symbol</b> | <b>Full Gene Name</b>                                  | <b>Accession No</b> | <b># of Bins</b> | <b>Percent viability (%)</b> |
|--------------------|--------------------------------------------------------|---------------------|------------------|------------------------------|
| TNFRSF10B          | tumor necrosis factor receptor superfamily, member 10b | NM_147187           | 5                | 18.84                        |
| DPYSL4             | dihydropyrimidinase-like 4                             | NM_006426           | 5                | 19.00                        |
| AGA                | aspartylglucosaminidase                                | NM_000027           | 5                | 19.42                        |
